# Supplementary material for: Inhibitors of the small membrane (M) protein viroporin prevent Zika virus infection
Source: eLife journal article supplement (doi:10.7554/elife.68404), 2024-08-23
Supplement: supp [file 2D.xlsx]

## Sheet: Sheet1
TX	51377	51495	51141	50007	50185	49950	50007	49678	49765	50069	49503	49748	49102	49057	49081	Small			1	2	3	4	5	6	7	8
TX	49863	49511	49746	49270	49335	48852	48716	47917	48273	48239	48166	47872	47502	47434	47554			TX	49081	47554	51274	48122	54737	49943	52584	53956
Lipo	3286	3363	3452	3559	3616	3656	3757	3833	3935	4014	4060	4157	4279	4306	4431			Lipo	4431	4564	4582	4614	4732	5210	5334	5364
Lipo	3473	3503	3605	3662	3775	3820	3930	3971	4052	4150	4230	4354	4424	4499	4564			M	28335	31749	27876	24417	27646	29535	20719	23296
M	8943	13852	17118	19515	21059	22235	23837	24605	25290	26503	26364	27129	27425	28091	28335			Rim	27630	28733	27647	32057	28223	27449	29352	27329
M	9445	15287	18999	21481	23455	24714	26324	27406	28437	28903	29301	30208	30411	31287	31749
Rim	8589	13449	16403	18447	20288	21583	22756	23569	24560	25060	25767	26743	26853	27223	27630				1	2	3	4	5	6	7	8
Rim	7179	13013	16335	18572	20384	22292	23563	24552	25542	26389	27089	27778	28050	28428	28733			TX
TX	54240	53657	53469	53855	52952	52793	52496	52584	52722	52384	51729	52045	52557	51640	51274			Lipo	0.156379	0.143753	0.164371	0.188967	0.171164	0.176401	0.257445	0.230254				small	1	2	3	4	5	6	7	8
TX	50918	49972	50672	49542	49690	48977	49258	48949	48875	49097	48850	48769	48570	48244	48122			M	1	1	1	1	1	1	1	1				TX	49081	47554	51274	48122	54737	49943	52584	53956
Lipo	3358	3476	3516	3652	3712	3783	3878	3913	4068	4120	4211	4343	4389	4486	4582			Rim	0.975119	0.905005	0.991785	1.3129	1.02087	0.929372	1.41667	1.17312				Lipo	4431	4564	4582	4614	4732	5210	5334	5364
Lipo	3382	3499	3557	3656	3780	3856	3932	4044	4133	4192	4278	4411	4456	4553	4614															M	28335	31749	27876	24417	27646	29535	20719	23296
M	8826	13227	16218	18058	19760	21131	22147	23497	24758	25620	26415	27041	27435	27868	27876
M	7358	11309	13790	15683	17094	18130	19170	20275	21063	21831	22254	22775	23124	23738	24417															normal	1	2	3	4	5	6	7	8
Rim	8871	13710	16499	18536	19903	21304	22120	23425	24127	24522	25559	25990	26944	27171	27647															TX	54497	52810	52412	52370	54860	53282	57920	52949
Rim	9629	16499	20460	22616	24683	26626	27216	28271	29777	30558	31068	31560	31957	32000	32057															Lipo	4004	4012	3960	4015	4066	4086	4120	4231
TX	57849	57722	57440	57198	56736	57148	56539	56505	55595	56025	55604	55353	55730	54506	54737															M	24321	24471	23603	22947	25046	25343	26161	25707
TX	52594	52201	52048	52208	51512	51686	51333	51140	50860	50745	50739	49868	50380	50183	49943
Lipo	3646	3705	3822	3857	3983	4038	4137	4185	4313	4364	4417	4506	4587	4671	4732
Lipo	3862	3989	4079	4194	4295	4360	4456	4593	4692	4768	4793	4922	5036	5162	5210
M	9901	14407	16604	18700	20211	21680	22678	23740	24041	25384	26065	26131	26990	27477	27646
M	9714	14573	17591	19899	21569	23209	24249	25395	25913	26962	27477	28176	28625	29356	29535
Rim	9923	14615	17770	19684	21334	22340	23421	24594	25009	25645	26794	27783	28276	28515	28223
Rim	9007	14001	16782	19045	20734	21972	22963	23703	24605	25415	26251	26667	26997	27715	27449
TX	55554	55206	54931	54721	54637	54199	53981	53826	54222	53333	53501	53466	53168	53023	52584
TX	56548	56485	56639	55934	55545	54709	55109	55266	54265	54706	54321	54618	54078	53859	53956
Lipo	3910	4018	4126	4253	4338	4450	4569	4654	4751	4859	4991	5019	5076	5252	5334
Lipo	3971	4047	4122	4221	4326	4494	4577	4660	4713	4823	5015	4991	5061	5210	5364
M	7242	9869	11702	13012	14023	14994	15934	16754	17500	18710	19188	19565	19725	20250	20719
M	7381	10954	13311	15266	17030	18355	19711	20445	20886	21640	22368	22514	22865	23422	23296
Rim	10566	15381	18419	20404	22086	23485	24550	25694	26536	27324	27715	27956	28969	28984	29352
Rim	8673	13203	16429	18438	19859	21347	22425	23499	24332	25090	25686	26282	26722	26991	27329
TX	56721	57543	56575	56672	56307	55853	55944	55091	55345	54737	54863	54629	54229	54179	54497	norm			1	2	3	4	5	6	7	8
TX	55620	54824	54974	54763	54926	53973	53901	54001	53407	53664	53657	53392	52980	52669	52810			TX	54497	52810	52412	52370	54860	53282	57920	52949
Lipo	3213	3256	3295	3357	3427	3444	3562	3583	3639	3658	3740	3768	3856	3896	4004			Lipo	4004	4012	3960	4015	4066	4086	4120	4231
Lipo	3197	3218	3291	3326	3403	3436	3524	3523	3673	3683	3742	3791	3923	3941	4012			M	24321	24471	23603	22947	25046	25343	26161	25707
M	4046	6076	8151	10069	12172	14041	15719	17284	18516	19892	21117	21898	22924	23422	24321			Rim	23572	26709	20962	26183	22123	21647	22390	24647
M	4159	6003	7936	9782	11685	13307	15175	16827	17827	19113	20412	21572	22384	22985	24471
Rim	4303	6813	8861	10689	12378	14137	15524	16849	18260	19301	20207	21222	22381	22932	23572				1	2	3	4	5	6	7	8
Rim	4368	6929	9504	11920	13852	15798	17231	18470	19900	21107	22412	23718	24763	25753	26709			TX
TX	55190	54548	54793	54762	54593	54422	53636	53346	52691	53305	53531	53081	52778	52560	52412			Lipo	0.164631	0.163949	0.167775	0.174968	0.162341	0.161228	0.157486	0.164586
TX	55677	54915	54825	54366	54556	54100	53652	53493	52561	53421	53076	53114	52999	52530	52370			M	1	1	1	1	1	1	1	1
Lipo	3182	3268	3316	3399	3426	3486	3550	3598	3694	3712	3775	3853	3861	3956	3960			Rim	0.969204	1.09146	0.888107	1.14102	0.883295	0.854161	0.855854	0.958766
Lipo	3213	3286	3322	3387	3460	3500	3558	3618	3692	3737	3809	3862	3893	4017	4015
M	3970	5975	7951	9547	11193	12475	14025	15479	16813	17780	19045	20263	21845	22155	23603
M	4085	5930	7682	9473	11184	12847	14226	15420	17026	18596	19792	20683	21803	22454	22947
Rim	4686	6600	8313	9803	11203	12542	14030	15314	16310	17463	18270	19184	19818	20493	20962
Rim	4912	7157	9336	11270	13108	14976	16889	18290	19564	20868	22165	23160	24615	24920	26183
TX	57676	57698	57610	57421	57020	57094	56396	55845	55955	55679	55923	55611	55254	55081	54860
TX	55860	55241	55537	54602	55118	54590	54594	53713	54181	53412	53742	52782	53145	52961	53282
Lipo	3245	3299	3354	3410	3487	3541	3601	3645	3688	3728	3833	3838	3920	4009	4066
Lipo	3242	3321	3408	3435	3513	3583	3619	3688	3746	3835	3820	3921	3976	4061	4086
M	4487	6956	9054	10987	12360	14010	15673	16935	18324	19850	20776	21791	22891	24052	25046
M	4561	6667	8786	10737	12751	14385	16038	17682	19070	20089	21300	22487	23519	24689	25343
Rim	5077	7387	9329	11091	12729	14106	15305	16549	17535	18508	19006	19940	20819	21441	22123
Rim	5062	6731	8318	9846	11303	12610	13900	14939	16186	16981	18032	19215	19837	20638	21647
TX	60937	60504	60053	59798	59186	58757	58636	59009	58196	57688	58437	58133	57577	58143	57920
TX	56418	55829	55575	55643	54838	54421	54275	54525	54665	54048	53545	53568	53500	53148	52949
Lipo	3317	3363	3424	3483	3505	3599	3667	3687	3743	3812	3885	3921	3995	4065	4120
Lipo	3347	3383	3454	3505	3579	3602	3661	3715	3824	3888	3966	3988	4044	4096	4231
M	4718	7051	9139	11194	13235	15264	17100	18615	19724	20967	22343	23719	24924	25532	26161
M	4553	6890	9027	11152	13303	15211	17227	18754	19991	21304	21875	22874	23943	24921	25707
Rim	5050	7155	8934	10901	12477	13988	15546	16864	17929	18966	19960	20176	20922	21488	22390
Rim	5284	7278	9423	11309	12889	14254	15838	17014	18532	19584	20685	21713	22785	23658	24647

## Sheet: Sheet2
	0.05uM	1	2	3	4	5	6	7	8	Aver
	TX
	Lipo	0	0	0	0	0	0	0	0	0
	M	1	1	1	1	1	1	1	1	1
	Rim	0.970507	0.889056	0.990169	1.3858	1.02518	0.914245	1.56113	1.22491	1.12012
	0.4uM	1	2	3	4	5	6	7	8
	TX
	Lipo	0	0	0	0	0	0	0	0	0
	M	1	1	1	1	1	1	1	1	1
	Rim	0.963134	1.10939	0.86555	1.17093	0.860677	0.826128	0.82891	0.950643	0.94692

## Sheet: Sheet3
TX	51377	51495	51141	50007	50185	49950	50007	49678	49765	50069	49503	49748	49102	49057	49081
TX	49863	49511	49746	49270	49335	48852	48716	47917	48273	48239	48166	47872	47502	47434	47554		TX	53617.9	53281.1	53260.8	52841.9	52574	52289.2	52179.9	51983.1	51822.1	51824.8	51551.6	51467.4	51385.9	50993.2	50906.4
Lipo	3286	3363	3452	3559	3616	3656	3757	3833	3935	4014	4060	4157	4279	4306	4431		Lipo	3611	3700	3784.88	3881.75	3978.12	4057.12	4154.5	4231.62	4332.12	4411.25	4499.38	4587.88	4663.5	4767.38	4853.88
Lipo	3473	3503	3605	3662	3775	3820	3930	3971	4052	4150	4230	4354	4424	4499	4564		Normal	8601.25	12934.8	15666.6	17701.8	19275.1	20556	21756.2	22764.6	23486	24444.1	24929	25442.4	25825	26436.1	26696.6
M	8943	13852	17118	19515	21059	22235	23837	24605	25290	26503	26364	27129	27425	28091	28335
M	9445	15287	18999	21481	23455	24714	26324	27406	28437	28903	29301	30208	30411	31287	31749
TX	54240	53657	53469	53855	52952	52793	52496	52584	52722	52384	51729	52045	52557	51640	51274
TX	50918	49972	50672	49542	49690	48977	49258	48949	48875	49097	48850	48769	48570	48244	48122
Lipo	3358	3476	3516	3652	3712	3783	3878	3913	4068	4120	4211	4343	4389	4486	4582
Lipo	3382	3499	3557	3656	3780	3856	3932	4044	4133	4192	4278	4411	4456	4553	4614
M	8826	13227	16218	18058	19760	21131	22147	23497	24758	25620	26415	27041	27435	27868	27876
M	7358	11309	13790	15683	17094	18130	19170	20275	21063	21831	22254	22775	23124	23738	24417
TX	57849	57722	57440	57198	56736	57148	56539	56505	55595	56025	55604	55353	55730	54506	54737
TX	52594	52201	52048	52208	51512	51686	51333	51140	50860	50745	50739	49868	50380	50183	49943
Lipo	3646	3705	3822	3857	3983	4038	4137	4185	4313	4364	4417	4506	4587	4671	4732
Lipo	3862	3989	4079	4194	4295	4360	4456	4593	4692	4768	4793	4922	5036	5162	5210
M	9901	14407	16604	18700	20211	21680	22678	23740	24041	25384	26065	26131	26990	27477	27646
M	9714	14573	17591	19899	21569	23209	24249	25395	25913	26962	27477	28176	28625	29356	29535
TX	55554	55206	54931	54721	54637	54199	53981	53826	54222	53333	53501	53466	53168	53023	52584
TX	56548	56485	56639	55934	55545	54709	55109	55266	54265	54706	54321	54618	54078	53859	53956
Lipo	3910	4018	4126	4253	4338	4450	4569	4654	4751	4859	4991	5019	5076	5252	5334
Lipo	3971	4047	4122	4221	4326	4494	4577	4660	4713	4823	5015	4991	5061	5210	5364
M	7242	9869	11702	13012	14023	14994	15934	16754	17500	18710	19188	19565	19725	20250	20719
M	7381	10954	13311	15266	17030	18355	19711	20445	20886	21640	22368	22514	22865	23422	23296
TX	56721	57543	56575	56672	56307	55853	55944	55091	55345	54737	54863	54629	54229	54179	54497			30	60	90	120	150	180	210	240	270	300	330	360	390	420	450
TX	55620	54824	54974	54763	54926	53973	53901	54001	53407	53664	53657	53392	52980	52669	52810		TX	56762.4	56387.8	56242.8	56003.4	55818	55401.2	55129.2	54877.9	54625.1	54494.2	54596.8	54288.8	54057.8	53908.9	53887.5
Lipo	3213	3256	3295	3357	3427	3444	3562	3583	3639	3658	3740	3768	3856	3896	4004		Con.	3244.5	3299.25	3358	3412.75	3475	3523.88	3592.75	3632.12	3712.38	3756.62	3821.25	3867.75	3933.5	4005.12	4061.75
Lipo	3197	3218	3291	3326	3403	3436	3524	3523	3673	3683	3742	3791	3923	3941	4012		M + 0.05 μM	4322.38	6443.5	8465.75	10367.6	12235.4	13942.5	15647.9	17124.5	18411.4	19698.9	20832.5	21910.9	23029.1	23776.2	24699.9
M	4046	6076	8151	10069	12172	14041	15719	17284	18516	19892	21117	21898	22924	23422	24321		M + 0.2 μM	8601.25	12934.8	15666.6	17701.8	19275.1	20556	21756.2	22764.6	23486	24444.1	24929	25442.4	25825	26436.1	26696.6
M	4159	6003	7936	9782	11685	13307	15175	16827	17827	19113	20412	21572	22384	22985	24471
TX	55190	54548	54793	54762	54593	54422	53636	53346	52691	53305	53531	53081	52778	52560	52412
TX	55677	54915	54825	54366	54556	54100	53652	53493	52561	53421	53076	53114	52999	52530	52370
Lipo	3182	3268	3316	3399	3426	3486	3550	3598	3694	3712	3775	3853	3861	3956	3960
Lipo	3213	3286	3322	3387	3460	3500	3558	3618	3692	3737	3809	3862	3893	4017	4015
M	3970	5975	7951	9547	11193	12475	14025	15479	16813	17780	19045	20263	21845	22155	23603
M	4085	5930	7682	9473	11184	12847	14226	15420	17026	18596	19792	20683	21803	22454	22947
TX	57676	57698	57610	57421	57020	57094	56396	55845	55955	55679	55923	55611	55254	55081	54860
TX	55860	55241	55537	54602	55118	54590	54594	53713	54181	53412	53742	52782	53145	52961	53282
Lipo	3245	3299	3354	3410	3487	3541	3601	3645	3688	3728	3833	3838	3920	4009	4066
Lipo	3242	3321	3408	3435	3513	3583	3619	3688	3746	3835	3820	3921	3976	4061	4086
M	4487	6956	9054	10987	12360	14010	15673	16935	18324	19850	20776	21791	22891	24052	25046
M	4561	6667	8786	10737	12751	14385	16038	17682	19070	20089	21300	22487	23519	24689	25343
TX	60937	60504	60053	59798	59186	58757	58636	59009	58196	57688	58437	58133	57577	58143	57920
TX	56418	55829	55575	55643	54838	54421	54275	54525	54665	54048	53545	53568	53500	53148	52949
Lipo	3317	3363	3424	3483	3505	3599	3667	3687	3743	3812	3885	3921	3995	4065	4120
Lipo	3347	3383	3454	3505	3579	3602	3661	3715	3824	3888	3966	3988	4044	4096	4231
M	4718	7051	9139	11194	13235	15264	17100	18615	19724	20967	22343	23719	24924	25532	26161
M	4553	6890	9027	11152	13303	15211	17227	18754	19991	21304	21875	22874	23943	24921	25707
