# Supplementary material for: Inhibitors of the small membrane (M) protein viroporin prevent Zika virus infection
Source: eLife journal article supplement (doi:10.7554/elife.68404), 2024-08-23
Supplement: supp [file 6FG.xlsx]

## Sheet: Sheet1
Sil	35271	38739	37759	37619	37622	37923	37505	37233	37362	37107	36675	36753	36671	36329	37079	36667	36306	36341	36321	36053	36232	36130	36088	36134	35860	35741	35833	35770	35894	36103
Sil	40643	40141	40114	40443	39708	39509	38781	38725	38517	38661	38312	38192	37806	38378	38450	38389	38228	37987	37813	37599	37370	37639	37610	37315	37280	37439	37467	37484	37255	37347
Tad	42028	40848	40024	39817	40022	39700	39155	38576	38998	38572	38168	38245	38168	38182	37994	37991	37354	37565	37538	37191	36994	37278	37347	37420	37225	37297	37105	37207	37067	37288
Tad	39170	37771	36288	36686	36649	36420	36455	35826	35901	35756	34898	35177	35233	36050	36190	36131	35417	35633	35450	35317	35323	35075	35390	34668	34538	35197	35291	34968	35084	34800
Rim	35202	39073	40537	41053	40719	39418	39145	39171	38845	39195	39006	39075	38957	38845	38586	38466	38782	38724	38703	38691	38375	38528	38571	38525	38683	38426	38213	38359	38690	38388
Rim	45448	47722	47827	48523	49048	49372	49549	49579	49736	49605	49892	49670	49457	49627	49161	49494	49385	49340	49290	49374	49290	49242	49418	49160	49216	49097	49307	48972	48793	49238
AA	4260	4784	5351	5930	6731	7363	8201	8706	9295	9771	10099	10737	11438	11647	12298	12822	13128	13705	14030	13797	14463	14401	14798	15107	15562	15549	15940	15765	16136	16544
AA	3546	3986	4479	5146	5915	6510	7106	7745	8390	8808	9389	9963	10350	10932	11150	11589	12018	12278	12849	13029	13356	13678	13851	14116	14495	14782	14915	15038	15465	15557
GNF	27924	30599	31352	32108	32229	32370	32365	32255	32030	32123	32006	31565	31743	31707	31199	31618	31217	31498	31537	31314	31652	31167	31085	31154	31393	31179	31173	31168	31114	31265
GNF	28217	30482	31273	31632	31577	31856	32106	31647	31758	31564	31766	31776	31044	31541	31566	31060	31160	31551	31264	31022	31445	31232	31126	31393	31075	31069	31062	30864	31133	30968
Rim	24530	29289	31420	32769	33549	34603	34764	35788	36232	36250	37117	37017	37375	37375	37902	37686	37698	38770	38541	38951	38941	39034	39252	39897	39839	40045	39953	40064	40460	40688
Rim	25049	30729	33662	34587	35558	35215	35849	35737	36181	36603	36679	36857	37775	37598	37682	37914	38447	38745	39021	38828	39083	39634	39454	39612	40323	39778	40429	40039	39904	40573
Sil	37885	39253	39957	39532	39393	40340	40081	39748	39569	39252	39296	38780	39244	39297	38742	38726	38977	38846	38825	38817	38595	38333	38327	38363	38117	37822	37945	38238	38163	38128
Sil	43185	40638	40562	41007	41869	41384	41987	40901	40709	40724	40516	40438	40732	40319	39984	39806	40003	39845	39687	40039	39804	39085	39768	39456	39237	39320	38958	39504	39149	39273
Tad	42836	41437	40704	41261	42375	42197	42185	41678	41138	40783	40164	40698	40549	40202	39810	40062	40411	40303	40238	39769	39742	40030	39562	39852	39817	39369	40093	39836	39535	39740
Tad	41047	41741	41558	41391	40661	40109	38953	38761	38085	38007	37881	37778	37528	37690	37781	37348	37742	37224	37313	37414	36863	37009	37219	37226	36680	37183	37390	36898	36957	36915
Red	35063	36951	37538	37392	37229	38022	37664	37809	37857	38077	37464	37940	37897	38067	37985	37585	38168	37857	37500	37509	38116	37891	37728	37508	37359	37412	37546	37872	37899	37607
Red	46378	49203	49632	49452	49379	49437	49590	49351	48891	48668	47976	48300	48292	47702	47222	48184	47976	47787	47630	47472	47697	47448	47031	46739	46976	47318	46768	46755	46624	46869
AA	12284	12441	12871	13466	13736	14334	14580	14999	15304	15886	16220	16544	16825	17146	17324	17758	18295	18334	18765	19084	19325	19564	19898	20248	20497	20674	20457	20868	21156	21299
AA	10668	11106	11509	11964	12265	12731	13123	13298	13756	14122	14435	14789	14921	15406	15498	15807	16225	16377	16560	16539	16719	16853	16991	16942	17164	17362	17431	17584	17593	17763
GNF	27120	30960	32253	32542	33158	33136	33592	33463	33160	33612	33647	33876	33675	33706	33915	33767	34105	33742	33649	33592	33514	33467	33808	33216	33284	33202	33462	33096	32964	32892
GNF	27023	31372	32006	32472	32929	32903	32961	33124	33178	33254	33496	33325	33859	33895	33400	33753	33204	33563	33552	33138	33328	33077	33029	33434	33146	33078	33069	32847	32693	32568
TX	50409	50595	50141	49648	49630	49387	49118	48733	49513	49007	48864	48752	48961	48722	48704	48488	48225	47882	48040	48594	48478	48461	48104	47742	47917	48104	47884	48334	47943	47754
TX	52062	51429	51535	51444	51608	51205	51012	50861	50706	50154	50375	49842	50198	50355	49800	49697	50076	49608	49720	49778	49738	49772	49977	49284	49145	49317	49693	49293	49117	49281
Sil	42179	41181	41373	42075	42888	41399	41375	41348	41289	40926	40872	40644	40259	40486	40497	40199	40030	40414	39606	39829	40002	39654	39798	39428	39787	39513	39523	39694	39618	39899
Sil	40818	41130	41092	41369	42458	41867	41549	41473	41782	41736	41541	41429	41461	41696	41402	41729	41270	40969	41468	41028	41141	40765	41091	40413	40817	40763	40712	40685	40546	40708
Tad	49179	47530	47281	47118	46847	47393	47435	46357	46788	46113	46736	46372	45887	46313	46157	45626	45744	44986	45643	45051	45368	45101	45481	45016	45054	45322	45156	45155	45050	44721
Tad	42091	40622	41065	40407	41658	41132	40819	40390	40013	39699	40257	40217	39975	40031	40548	39631	39911	39975	39839	39759	39257	39560	39314	39438	39045	39115	39052	39023	38710	39221
TX	54487	53881	53793	53612	53626	53300	52877	53050	52495	52963	52582	52415	52324	52647	52130	51945	52269	52074	51685	51611	51867	52260	51532	51788	51034	51085	51717	51637	51378	51182
TX	55050	54494	54846	54360	54167	53732	54074	53622	52969	53051	53156	53302	52943	53063	52863	52899	52477	52351	52172	51987	52554	51915	52380	52537	52259	52013	52414	51969	51711	52021
AA	18921	18797	19143	19366	20515	20913	21074	21093	21189	21519	21766	22219	22337	22836	23196	23335	23950	24067	24561	24729	25047	25316	25732	25904	26089	26118	26689	26831	27156	27581
AA	15246	15691	16012	16414	16542	17021	17360	17637	18055	18405	18553	18726	19217	19558	19651	20102	20200	20691	20818	21389	21416	21834	21987	22094	22228	22724	22823	23109	23174	23671
GNF	26981	30732	32547	33216	33866	34545	34448	34395	34233	34341	34463	35019	34492	34758	34967	35047	34731	35262	35422	34700	35250	35022	35316	35127	35066	35010	35198	34678	34824	34870
GNF	26136	29514	31377	31729	32891	32941	32911	33128	33144	33589	33021	33446	33605	33554	33285	33624	33689	33781	33793	33880	33910	33578	33878	33509	33851	33145	33581	33609	33741	33194
Buffer	4714	4733	4860	4993	5077	5119	5260	5389	5425	5521	5531	5647	5644	5721	5812	5828	5893	5928	5985	6035	6097	6107	6245	6260	6301	6348	6384	6433	6429	6441
Buffer	5078	5150	5248	5312	5406	5514	5597	5641	5735	5760	5891	5922	5957	6039	6079	6101	6205	6214	6288	6276	6340	6421	6487	6474	6601	6613	6667	6658	6662	6784
Sil	47615	48036	48433	49250	49447	48524	48423	47955	48277	47906	47463	47352	47619	47437	47350	47597	47057	47045	46897	47201	46765	46613	46731	46778	46709	46413	46664	46712	46920	46527
Sil	49788	49430	49792	50140	49702	49999	49727	49786	49098	48954	48986	48153	48784	48437	48666	48161	47973	48200	47891	47613	47672	47700	47376	47346	47462	47517	47019	47772	47554	47197
Tad	55719	54829	53996	53439	52988	52887	52160	51737	51883	51228	51130	50801	50530	50190	50645	50580	50269	50323	50298	49653	49816	50042	49803	49484	49903	49714	49728	49332	49359	49734
Tad	46745	46456	47156	47931	47146	47638	47222	46616	46592	46132	46313	45876	45934	45570	45992	45776	45856	45359	45941	46069	45420	45104	45362	45015	44942	44611	44981	45290	44851	45548
Buffer	5757	5873	5977	6039	6268	6308	6377	6487	6555	6649	6693	6796	6849	6897	6926	6999	7101	7165	7205	7263	7260	7303	7380	7470	7487	7625	7605	7676	7613	7716
Buffer	6402	6566	6633	6739	6866	7032	7060	7169	7244	7340	7411	7464	7491	7616	7619	7762	7803	7788	7879	7923	8023	8083	8061	8103	8262	8258	8302	8357	8333	8340
AA	22080	22550	23164	23686	24015	25216	25581	25988	26371	26705	27099	27073	27522	27944	28475	28611	28727	29139	29563	29706	29977	30591	30950	31231	31561	31384	32125	32421	32519	32853
AA	21045	21577	22035	22761	23177	23135	23796	24231	24445	24960	25085	25329	25818	26300	26794	26813	27472	27414	28057	28013	28614	28588	29190	29382	29584	30124	30304	29977	30723	30832
GNF	26281	29860	31078	32630	33409	34337	34616	35001	35198	35198	35356	35540	35717	35625	36131	36351	36263	36601	36604	36783	36850	36882	37298	36825	37306	37032	37421	37182	37282	37201
GNF	7846	8782	9388	9913	10280	10414	10586	10822	11285	11394	11578	12022	12043	12294	12539	12680	12875	13260	13421	13602	13786	13827	14033	14235	14325	14394	14526	14664	14799	15002
Sil	47419	48249	48603	49463	49544	49616	48400	48413	47988	47759	47314	47691	47598	47265	47441	47491	47137	47099	46824	46981	46801	46728	46521	46508	45814	46420	46546	46327	46107	45840
Sil	49083	49780	50734	51541	51000	50559	49954	50183	50174	50006	49635	49926	49642	49698	49350	49567	49214	49311	48946	48722	48827	48644	48895	47968	48796	48693	48463	48027	48023	48573
Tad	52044	52945	53556	54802	54820	54284	54033	53848	54380	53315	53044	53200	52323	52755	52290	52432	52243	51520	51284	51544	51649	51826	51472	51080	51488	51320	50963	51380	51154	51356
Tad	56871	55911	55685	54385	53921	53902	52918	52869	52633	52485	52282	51984	51690	51379	51806	51567	51618	51234	50594	51603	50750	50880	51418	51205	51167	51243	50739	50523	50208	50360
AA	32858	36980	38413	39317	40259	40970	42814	42654	43249	43582	43570	44105	44027	43673	44071	44597	44165	44253	44674	44755	44869	44519	45179	45092	44867	44945	45236	45255	45186	45533
AA	30722	35317	37593	39022	39418	40017	40260	40465	39852	40113	39717	40067	40068	39928	40519	40295	40613	40764	40676	41045	41011	40927	40820	40905	40967	41525	41347	41760	41631	41173
GNF	35336	39116	40643	42038	42481	43521	43709	44316	45105	45265	45647	46107	46062	46106	46492	46710	46983	46726	47048	46926	46995	47002	47747	47731	48035	48464	47241	47974	48376	48304
GNF	34601	37820	40094	40960	41346	42068	42606	43381	43423	44020	44389	44955	44921	45276	45616	45198	45585	45375	45501	45938	45698	45827	46079	46029	46146	46108	45765	46398	46476	46672
Sil	53720	53815	54926	56083	55667	54580	54773	54204	53415	52931	52397	52650	52348	52338	51856	52129	52040	52187	52016	52099	51730	51277	51581	51658	51612	51025	51716	51230	51368	51444
Sil	57129	56057	56710	57059	56444	55962	55777	55120	54490	54493	54252	53525	54151	53667	53644	53431	52852	53134	53138	53050	53234	53112	52975	52953	53023	53192	53127	52960	53071	53010
Tad	53419	53665	53454	53932	53878	53433	53515	52550	52210	51212	51237	51449	50867	50403	51054	51047	50795	51003	50879	50409	50931	50129	50310	49841	50066	49784	50057	49644	50031	49397
Tad	52651	52728	53976	53802	53581	53149	52724	52336	51788	52046	51519	51876	51491	51443	51709	51284	51149	51130	51415	51053	50537	50522	50960	50877	51013	50730	50430	50324	50193	50587
AA	37401	42150	44329	45210	46931	47616	48817	48732	49940	50277	50754	51075	51345	51469	51880	51603	52148	52442	52876	53250	52571	53033	52706	53481	53557	53896	53735	53616	54311	54333
AA	36029	40542	42530	43678	44774	45281	45942	46204	46771	46682	47332	47733	48202	48400	48805	48998	49342	49352	49348	49161	49874	50290	50614	50180	50447	49906	49819	50355	50374	50753
GNF	36491	40746	42139	43792	44903	45679	45679	46310	47372	46985	47747	47732	48496	48892	48665	49096	49076	49446	49475	49321	49681	49786	49959	49709	50392	50119	50135	50263	50619	50258
GNF	39362	43527	45629	46717	47845	48554	49314	49911	50214	50546	50423	51116	51351	51220	51759	51749	51523	51348	51879	52111	52243	52662	52098	52497	52743	52846	52498	53509	52682	53151
Sil	50756	49784	50454	48944	49865	48731	48480	48004	47601	47452	47149	47114	46766	46846	46678	46821	46681	46589	46198	45656	45968	46244	45649	46309	46201	46073	45281	45623	45576	46138
Sil	51815	52143	52177	52569	52904	52465	52035	52018	51227	50789	50614	50430	50544	50430	50547	49634	49205	49406	49467	49381	49640	49560	49467	49617	49136	49222	49261	48632	48598	49113
Tad	53601	52792	53519	53144	53007	53490	52822	52119	52256	51450	51380	50594	51205	50857	50710	50138	50149	50350	50160	49807	49904	49519	49987	49751	49626	50043	49582	49570	49036	49091
Tad	52739	52385	52265	51691	52643	52513	51046	51267	50540	50181	50031	50209	50098	49404	49441	49449	48981	49070	48451	48585	49123	48806	48550	48510	48217	48749	48744	48307	48587	47873
AA	37371	40515	42361	43656	44532	44525	45510	45612	46503	46705	46951	47427	47392	47890	47665	47707	47994	48262	47944	48241	48511	48308	48366	49017	48689	49246	48709	49095	49218	48992
AA	38430	42352	44071	45471	46700	46811	47721	48398	48886	49192	49964	49355	50304	50429	50240	50783	50897	50648	50998	50671	51277	51402	50943	52138	51576	51492	51460	52490	52246	51796
GNF	42107	46041	48568	48892	49992	50503	51063	51421	52795	52344	52589	52764	53189	52948	52992	53362	53552	53720	53730	53873	53965	54730	54269	54677	54130	53594	54583	54920	55188	55148
GNF	44678	48389	49928	51385	51556	52555	53637	53921	54832	55275	54859	55315	55622	55715	56050	55897	55601	56187	56209	56153	56209	56617	56126	56564	56930	56635	57097	57035	57005	56863
Sil	54523	55351	55214	55478	55517	54573	54373	53679	53884	53214	52242	52020	52300	51735	51361	51716	51314	51453	51087	50961	51051	50804	50507	50726	50662	50433	50577	50594	50690	50326
Sil	55944	56255	55474	56508	55549	55896	55833	55634	55089	54505	54126	53849	53808	53818	53483	53145	53097	53230	53176	52570	52718	52172	52831	52332	51963	52011	52064	52223	52166	52120
Tad	58222	56977	57177	56491	56283	55730	54842	54900	54696	53827	54470	53805	52910	53179	53354	53209	52899	52962	52234	52969	52683	52523	52356	52788	52494	52487	51866	52473	52072	52560
Tad	56949	57381	57421	57221	57268	56839	56076	55143	55228	54535	54437	54565	54045	53715	53708	53641	53466	53423	53351	52275	53076	52980	52563	52785	52241	52745	51798	52425	52294	52364
AA	39169	43031	45412	46839	47862	48130	48901	48863	49728	50161	51160	50771	51152	51768	51294	51799	52244	52335	52060	52606	52937	52868	53252	53266	53575	53104	53404	53112	53666	53525
AA	41758	45366	47430	48705	49805	51090	51229	51989	52613	52392	52349	53183	52809	54028	53575	53750	53325	53709	54306	54206	54543	54097	54649	54443	54745	54929	54777	55467	55061	54955
GNF	39285	43410	45609	46630	47749	48606	49419	49719	50056	51174	51743	51669	52060	51988	52106	52387	52924	52625	53476	53650	53796	53304	53792	53485	53702	54325	54382	54529	54399	54550
GNF	41056	45019	47548	48041	49103	49951	51030	51414	51871	52608	52343	53086	52970	53024	53251	53787	53469	53694	53969	54091	53961	54420	54244	54143	54501	54441	54842	54497	55222	54831

## Sheet: Sheet2
Sil	45039	44256	44003	43734	43682	42694	42779	42034	42138	41685	41730	41874	41606	41312	41727	41333	41280	41518	41302	41305	40954	41224	41040	40793	40511	40807	40613	40297	40440	40820
Sil	41993	42168	42743	41923	41694	41651	41515	40924	41219	40621	40756	41084	40946	40415	40627	40442	39862	40324	40125	40204	40308	40124	40008	39970	39836	39869	39992	39862	39824	39725
Tad	40537	42318	42567	41962	41766	40907	41353	40723	41090	41001	40962	40825	40837	40863	40466	40692	40453	40080	40430	40554	40141	39914	39816	40067	40305	39845	40052	40011	39836	39456
Tad	38509	39036	39289	38776	39150	38872	39015	39477	39146	38900	39359	39283	39308	38883	39247	39106	39010	39394	38644	39185	38674	38530	38552	38819	38699	38397	38728	38641	38299	38549
Rim	32878	37020	37755	38831	39577	39856	39932	40149	40284	40521	40448	40068	40387	40513	40296	40539	40602	40484	40656	40159	40728	40227	40541	40881	40645	40544	40715	39905	40196	40570
Rim	35360	41188	42569	42988	43390	43691	43862	43373	43962	43602	43585	43621	44047	44062	43884	43572	43947	43538	43585	43725	43721	43668	43749	43745	43894	43544	43536	43869	43895	43468
AA	5369	6051	6674	7543	8302	8999	9625	10188	10680	11201	11513	12068	12415	13111	13673	14160	14836	14910	15206	15561	16005	16265	16266	16492	16908	17243	17687	18184	18226	18209
AA	5305	5870	6615	7352	8066	8656	9284	9975	10228	10568	10975	11347	11647	12116	12319	12734	13124	13392	14105	14356	14588	14964	15318	15529	15739	15926	16014	16434	16549	16938
GNF	31724	33892	35191	35284	35758	35725	35350	35912	35540	35858	35855	35461	35136	35282	35283	34391	35119	34558	34898	34436	34580	34605	34297	34469	34762	34594	34904	34721	34571	34842
GNF	33570	35842	36105	36362	36614	36450	36343	35999	36248	35976	35984	35750	35443	35799	35211	35231	35210	34997	35080	35070	35059	35006	34876	34575	35328	34955	35164	35286	35051	34789
Rim	21797	24967	26741	27503	28224	28966	28623	29054	28815	28923	29067	28832	29528	29552	29486	29758	29887	29805	30062	30208	30396	30277	30465	30593	30483	30555	31094	31366	31061	31576
Rim	20896	24878	26821	27039	27917	28831	28743	29012	29233	29400	29567	29497	30111	30176	30399	30586	30534	30582	30114	31074	31472	30958	31602	31490	31433	32079	31507	31697	32039	32393
Sil	47765	47784	46541	46248	46349	45230	45578	44998	44509	44588	44374	44235	44173	43998	43804	43805	43605	43604	43477	43460	43537	43229	43226	43105	43339	43264	43160	42733	43037	42516
Sil	43720	42964	42845	42937	42550	42762	42406	42910	42970	42808	42714	42580	42596	42538	42461	42087	42171	41890	41636	41663	41940	41508	41502	41615	41536	41329	41551	41416	41932	41415
Tad	39401	39935	40218	40017	40676	40812	40959	41140	40960	41047	40431	40243	40612	40042	40243	40063	40232	39936	40290	40122	39670	39803	40153	39754	39507	39483	39568	39850	40006	39706
Tad	37470	39196	39221	39204	39545	39807	39313	39417	39266	39441	39186	39565	39290	39338	39395	39151	38990	38862	38685	38493	38699	38784	38612	38794	38383	38766	38184	38921	38497	38556
Red	44260	45441	45730	45597	45598	45303	45417	45047	44906	44814	44743	44405	44493	44271	44046	44048	43984	43997	44156	43612	43927	44103	44035	43915	43540	44042	43429	43876	43718	43921
Red	46104	48178	48746	48408	49009	48599	49121	48299	48540	48526	48306	48089	48343	48409	48367	47882	47656	47684	47469	47791	47804	47137	47523	47548	47228	47327	47271	46982	46759	46837
AA	17457	17794	18187	18498	18747	19178	19604	19974	20214	20608	21046	21285	21631	21930	22163	22294	22883	22975	23292	23667	23883	24187	24404	24630	24934	25049	25138	25564	25715	25927
AA	12572	13058	13492	14075	14506	15099	15526	15877	16282	16783	17208	17558	17884	18137	18580	18955	19145	19326	19695	20081	20471	20746	21064	21280	21342	21657	22005	22621	22765	22921
GNF	30396	33769	34895	35012	35512	35629	35838	35994	35875	36235	36278	35730	36220	36010	36161	36390	36178	36247	36137	36405	36070	36112	35773	36088	36345	35836	35985	36013	36259	36237
GNF	30061	32989	35035	35595	35896	36049	35938	35841	36332	36518	36493	36093	36822	36436	36750	37074	36977	37147	37202	36990	37054	36605	36881	37073	37209	37251	36850	37122	36669	36999
TX	57185	56915	56867	56443	56076	56236	55765	55375	54999	55348	55039	55311	55315	55307	54869	55076	54796	54284	54620	54530	54135	54150	54125	53728	53752	54432	54181	54335	53873	54517
TX	58252	57946	57529	57667	58014	57269	56500	56815	56426	56219	56231	56349	56076	56167	55715	55637	55320	55885	55809	55413	55599	55558	55268	55003	54900	55852	55004	55016	55486	55405
Sil	39298	38917	39742	39379	39192	38906	38760	39084	38859	38739	38685	38614	38895	38298	38607	38312	38067	38641	38128	38379	38205	38302	38601	38015	38083	37962	38111	38367	38233	38093
Sil	36110	37040	37611	38070	37961	37927	37926	38080	37916	38141	37666	37840	37554	37774	37546	37659	37483	37072	37401	37322	37111	37231	37141	37222	37356	37097	37210	37338	37206	37032
Tad	36136	36994	37479	37556	37202	37714	37546	37473	37736	37642	37686	37510	37314	37230	37053	37101	37194	37117	37164	36829	37227	36564	36454	36824	37026	36740	36476	36581	36665	36386
Tad	30138	30812	31275	31072	31456	31353	31408	31239	31144	31570	31312	31291	31364	31406	31516	31346	31363	31190	31038	31233	31017	30949	31027	30507	30854	31162	31111	31066	30765	30891
TX	54517	54218	54225	53524	53341	53562	53170	53047	52981	52455	52434	51993	52163	52496	52081	52136	51612	51818	52315	52021	51861	51627	51786	51358	51402	51734	51276	51614	51503	50760
TX	55036	55002	55078	54666	54431	54161	54238	54016	53968	54097	53088	53332	53415	53277	52796	53405	52868	53001	52878	52368	52539	52840	52529	53013	52764	52458	52547	52504	52121	52302
AA	15751	16605	17059	17359	17778	18041	18510	18872	18918	19451	19804	20160	20410	20850	21108	21564	21685	22115	22475	22727	23000	23068	23057	23720	23714	23985	24325	24672	24894	24814
AA	2545	2990	3547	4150	4746	5241	5845	6268	6849	7423	7803	8360	8893	9443	9905	10352	10865	11407	11551	12087	12554	12900	13490	13744	14281	14714	15026	15265	15819	16027
GNF	25533	27803	28797	29746	30073	30120	30151	30299	30401	30185	30103	30256	30116	29948	30313	29983	30152	30335	30337	30217	30298	30270	30179	30420	30377	30295	30489	30158	30154	30325
GNF	25209	27884	29328	29970	29581	30124	29756	29739	29949	29479	29792	29998	30211	29892	29820	29910	30112	29879	29840	29983	30003	29969	30109	30046	30094	30005	30093	30329	30190	30291
Buffer	6146	6325	6473	6623	6711	6780	6862	7024	7063	7069	7199	7241	7420	7287	7547	7571	7548	7616	7806	7816	7813	7896	7938	7943	7962	8044	8002	8137	8092	8123
Buffer	6072	6163	6376	6512	6587	6646	6802	6903	6947	7016	7129	7196	7256	7317	7319	7458	7437	7613	7624	7666	7677	7688	7807	7740	7869	7957	7895	7983	7969	8072
Sil	51724	51770	51597	51178	50092	50411	49525	48777	49123	48334	48529	47817	48382	48004	48430	47956	47918	47860	47597	47969	47609	47817	47112	47446	47695	47194	47295	47109	47605	47030
Sil	48452	48509	48543	48625	47504	47563	46960	47259	46883	46328	46641	46655	46504	46109	46198	46386	46361	46108	46003	46196	45968	45888	45575	45844	45836	46314	45947	45605	45776	45582
Tad	44285	45297	45391	45807	45509	45643	46155	45619	45733	45554	45558	45532	45531	45081	45386	44979	44504	44736	45126	45083	44894	44523	44260	44513	44829	44480	44508	44385	44144	44266
Tad	43609	45468	46175	45808	46559	46075	45982	46156	46021	45718	46088	46228	46167	45414	45661	45584	44958	45495	45758	45315	45328	45222	44911	44737	45406	45079	44495	45146	44985	44931
Buffer	5664	5841	5935	6081	6258	6333	6450	6513	6652	6781	6857	6874	6937	7085	7061	7192	7209	7257	7339	7310	7356	7469	7536	7540	7555	7680	7679	7782	7847	7881
Buffer	6512	6657	6809	6865	7103	7217	7309	7384	7370	7551	7694	7768	7822	7892	7975	7950	8147	8280	8048	8320	8356	8399	8363	8607	8467	8505	8637	8602	8718	8695
AA	26226	27087	27642	28174	29112	29991	30412	30757	31330	31679	32438	32741	33513	33965	34090	34719	35399	35457	35837	36566	36869	37164	37290	37377	37927	38479	38396	39213	38547	38875
AA	22355	23377	24225	24615	25192	25932	26209	26863	27249	28174	28079	28690	29518	30072	30322	30965	31419	31573	32418	32377	33053	33084	33471	34176	34288	34577	34876	35078	35447	35498
GNF	33948	37480	37840	37597	38744	38775	38790	39092	39671	39092	39524	39497	39590	39463	39574	39481	39656	39687	39373	40003	40081	40232	40031	39870	40206	39929	40094	40203	39891	40075
GNF	31376	34810	35730	35696	36525	37352	37683	37676	37745	37607	37381	37972	37916	38253	38385	38012	38223	38651	38366	38608	38312	38681	38615	38530	38762	38898	38287	39065	38837	38695
Sil	46527	48076	47117	46805	46247	46418	46130	46171	45971	45741	45673	45738	45309	45677	45234	44956	45049	44924	45335	44898	45130	44854	45173	45165	45008	44623	44993	45240	45373	45384
Sil	46578	46516	46304	46491	46180	46291	45640	45454	45881	45780	45502	45001	45295	45147	44972	45263	45000	44860	44849	44771	44800	44500	45052	44300	44517	44507	44326	44423	44566	44185
Tad	45965	45898	45984	45619	45343	45566	45136	45978	45141	45185	44993	45026	44940	45132	44683	44350	44588	44178	44593	44621	44297	44368	44337	44256	44234	44205	44330	44109	44362	44198
Tad	46698	46896	46608	46141	46731	46012	45818	45514	45367	44584	44677	44798	44772	44827	44020	44368	44118	44054	44106	44052	43932	44130	43692	43760	43804	43720	43618	43780	43738	43356
AA	30202	33273	34011	34947	35742	36233	36725	37698	37442	37844	37961	38136	38137	38061	38055	37879	38229	38130	38056	38321	38191	38357	38589	38719	38500	38409	38578	38622	38716	38886
AA	30032	32519	34153	35320	35676	36464	37259	37569	38657	37915	38164	38244	38168	38102	38391	38421	38790	38476	39061	38377	38650	38782	38545	39073	39008	38947	39045	38742	39333	39171
GNF	33258	35760	36595	37703	38021	38422	38661	39304	39423	39892	39356	39772	39968	40143	40269	39844	40398	39858	40527	40238	40115	39883	40297	39950	39993	40142	39871	40263	40440	40066
GNF	33518	36854	38314	38788	38735	39453	39156	40446	39755	40503	40702	40542	40928	40692	40379	40837	40877	40987	41234	40996	41588	40851	41536	41519	41091	41601	42105	41904	41896	41635
Sil	54718	55933	54939	54262	53922	53694	53673	53729	53760	53512	53821	53753	53856	53121	53111	53267	52726	52660	53209	52952	52741	53328	52527	51622	52754	52530	52751	52551	52479	52687
Sil	48652	50264	51706	51443	50863	51012	50958	51284	50581	50465	50434	50414	50319	50139	50243	49307	49986	49349	49949	49922	49830	49601	50010	49478	49687	49345	49257	49722	49616	49781
Tad	50836	50552	50530	50581	50665	50709	50479	50204	50326	50435	49845	50250	50423	49674	49809	49718	49576	49207	49645	49085	49005	48840	48982	48866	49171	48808	48767	49439	48748	48167
Tad	54879	54633	53790	53855	53371	53635	53492	53373	53318	52707	53223	52780	52989	52979	52688	53006	52502	52491	51943	52177	51743	51925	51482	51803	52124	51563	51900	51682	51845	51729
AA	38042	41149	43350	44140	45171	45253	46006	46043	47325	47877	48066	47999	47987	47998	48522	48474	48032	48241	49012	48726	48359	48717	48660	48921	48956	49164	49217	49373	49191	49392
AA	39173	41076	42193	42615	42808	44067	44360	44351	45258	45100	45056	45395	45562	46044	45912	46381	45573	46071	46606	46654	45865	46205	45968	46136	46661	46689	46519	46936	46406	46658
GNF	36138	38644	40075	41232	41532	42780	43344	43615	44016	44895	44560	45088	45546	46353	46981	46370	46622	46874	46498	47108	47183	46849	47258	47227	46905	47068	47281	47029	47192	47301
GNF	38031	41498	42878	44177	44546	45435	45782	46413	46761	46958	47151	47339	46853	47236	46998	47771	47120	47658	47697	48081	48011	47948	48279	48513	48056	48474	48322	48613	48943	48224
Sil	52236	52861	52082	52120	51473	50702	50643	49831	50005	49872	49521	49195	49622	49179	49277	49107	48684	49052	48831	48767	48345	48756	49011	49049	48796	48671	48268	48268	48191	48078
Sil	49782	49820	49392	49185	49263	49613	49346	49250	49281	48977	48935	49009	48426	48462	48315	48385	48069	48620	48155	48396	48502	48214	47885	47773	47961	47827	47848	47634	48207	47648
Tad	51689	52106	51836	52199	51530	51074	51378	50750	50866	50076	50302	50605	50467	49874	50052	50055	49991	49640	49226	48971	49718	49530	49692	49161	49312	49143	49196	49032	49627	48909
Tad	51413	50722	50926	50551	50530	49781	49594	49508	49622	49353	49248	49230	48731	49025	48724	48854	48423	48505	48571	47997	48569	48026	48358	48303	48340	47946	48232	48215	48205	47888
AA	38807	41412	43158	44215	44976	45528	46611	46430	46519	46869	47967	47858	47960	48562	47594	48022	48656	48586	48972	48727	48783	48798	49415	49398	48863	49252	49456	48958	49620	49697
AA	41093	41780	43298	44056	43974	44849	45887	45553	46234	46394	45933	46666	46157	46284	46554	46441	46139	46111	46157	46904	46860	46209	46265	46741	46088	46658	46019	46637	46635	45794
GNF	36981	39639	40704	41269	41692	42397	43396	43123	44076	45132	45208	44975	45128	45880	45402	46002	46089	46017	45701	45726	46027	46066	45932	46698	46370	46266	46952	46755	46847	46770
GNF	37973	41293	42852	44026	44893	45464	46105	46451	46515	46717	47499	47451	47794	48271	47831	48270	48388	47847	48563	48769	48794	49060	49345	49467	48882	49573	49750	49351	50081	50102
Sil	52333	52230	51895	50899	51462	50767	50618	50273	49823	49417	49452	49747	48500	49043	49069	48900	48425	48721	48615	48594	48275	48267	48336	48252	48121	48374	48075	48091	47903	48032
Sil	50480	50250	49860	49607	49674	49663	49165	48691	48360	48395	48139	47892	48266	47809	47621	47494	47233	47589	47499	47204	46845	47259	47082	47253	47385	47676	47277	47300	47237	46812
Tad	49155	48643	49097	49365	49559	48960	49205	48973	48791	48966	48357	48145	48727	48512	48522	48235	47661	48124	48309	47719	47876	48187	47955	47766	47782	47875	47924	47689	47689	47568
Tad	52003	51359	51786	50345	50308	50120	49856	49054	49441	49235	48637	48283	48124	47973	47930	47960	47427	48010	47828	47685	47713	47376	47071	47072	47479	47425	47454	47415	47940	47656
AA	40887	43807	44933	45461	46929	47510	47820	48321	48259	48819	49110	49038	49523	49319	49321	49790	49550	49602	49846	49592	49297	50142	50322	49391	49865	49404	50274	50228	50177	50328
AA	37998	40169	41695	43181	43697	44240	45434	45699	46300	46614	47474	47412	46693	47028	47415	47571	47645	47400	47725	47541	47875	47957	47550	48142	48220	48139	48283	48664	48445	48347
GNF	35551	39010	40256	41521	42445	42408	42905	43968	43717	43948	44437	44689	44464	44242	45204	44779	45357	45135	44756	45098	45076	45491	45842	45299	45885	46038	46019	46412	46530	46669
GNF	36652	38903	41469	42294	43575	44034	45155	45345	45670	45569	46189	47197	46897	46824	47073	46942	47281	47393	46681	47388	47398	47971	48265	47628	47941	47896	47855	47494	48565	48533

## Sheet: Sheet3
Sil	41903	42200	41014	40515	39340	39401	39230	38667	38090	38715	38400	38697	38227	38358	37976	38149	38087	37915	37692	37759	37941	38032	38012	37571	37742	37711	37492	37467	37430	37882
Sil	41380	40217	40135	39842	39027	39195	37980	38722	38302	38149	37667	37821	37908	37783	37781	37662	37682	37666	37617	37461	36747	37254	37565	37260	37556	37365	37312	37355	37207	37465
Tad	41583	41520	41072	40220	40525	39929	39511	39205	38845	38617	38300	38396	38689	38436	38492	38553	38510	37981	38186	38375	37743	38019	37983	37950	37926	37980	37362	37973	37896	37829
Tad	35805	37796	38002	38490	37919	37706	37524	37850	38148	37880	37886	37846	37610	37765	37647	37727	37479	37362	37343	37799	37419	37327	37535	37557	37528	37221	37252	37232	37457	37528
Rim	30246	33623	34217	34020	34495	34386	34600	35207	34974	35455	34924	35190	35609	35652	35442	35626	35197	35333	35448	35656	35755	35401	35873	35982	35984	35652	35825	35966	36226	35860
Rim	33053	36842	36908	36592	36517	36256	36190	35887	35930	35771	35997	36029	36196	36003	36440	36117	36012	36167	36179	36437	36277	36317	36510	36600	36467	36520	36591	36513	36937	37020
AA	8372	8911	9759	10535	11269	11934	12610	13080	13587	13945	14874	15283	15667	16303	16681	16983	17441	17757	18222	18452	18834	18933	19123	19701	19797	20154	20440	20515	20641	20808
AA	8763	9433	9979	10738	11346	12170	12572	13218	13715	13889	14437	15480	15801	16017	16829	16865	17211	18029	18167	18583	18925	19113	19179	19457	19961	20272	20453	20684	20805	20929
GNF	33391	35790	36424	36283	36685	36348	36514	36473	36689	36340	36133	35927	36157	36368	36255	36243	36155	36346	35933	36109	36141	36189	36574	36193	36402	36620	36321	36424	36241	36284
GNF	33783	36156	36554	37090	36853	36894	37121	36554	36494	36841	36337	36599	36527	36521	36380	36288	36223	36057	36386	36461	36532	36175	36655	36281	36422	36465	36575	36322	36725	36740
Rim	25125	29345	30763	31109	31181	31082	31407	32344	32364	32787	32003	32265	32229	32313	32496	32865	32728	32988	33199	33242	33745	33575	33829	33520	33810	34095	34286	34305	34531	34581
Rim	28384	33124	34740	34508	34030	34149	34742	34062	33836	34340	34293	33982	34331	34318	34757	34491	34759	34736	35040	34962	35397	35380	35533	35457	35578	35747	35537	35756	35792	35938
Sil	40905	41225	41855	41211	40007	39592	39814	39049	38926	38432	38754	38605	38595	38598	38449	38115	38064	37473	38166	37983	37874	37508	37416	37261	37734	37727	37750	37583	37722	37729
Sil	41190	41162	40669	40177	39856	40288	39723	39330	39050	38575	38763	38712	38943	38804	38413	38499	38230	38447	38349	38155	38627	38102	38310	38455	37665	38065	37913	38032	38474	37804
Tad	41378	41966	41607	41500	41176	40731	40466	39771	38723	39162	39026	39126	38660	38378	38649	38702	38498	38002	38196	38059	37883	38223	38132	38355	37927	38096	37891	38141	38047	38062
Tad	37561	37675	38093	38402	38717	37939	38290	38052	38103	38018	37846	38028	37411	38019	38002	37861	37854	37526	37911	37823	37507	37682	37548	37563	37388	37440	37902	37976	37651	37606
Red	37408	38324	38617	38619	38352	38275	38109	37967	37727	37600	37438	37486	37538	37423	37534	37315	37506	37309	37064	37199	37215	37280	37253	37202	37103	36980	37422	36919	37032	36975
Red	39520	39596	40447	40268	39906	40066	40014	39866	39686	39530	39124	39385	39433	39162	39162	38731	38838	38768	38581	38830	38717	38800	38762	38378	38594	38727	38857	38594	38253	38743
AA	15901	16477	17063	17263	17727	18278	18756	18959	19436	20020	20045	20549	20727	20992	21132	21688	21857	22005	22360	22461	22980	22965	23332	23563	23853	24138	24440	24694	24617	25199
AA	16246	16571	16723	17210	17673	17993	18512	18672	19121	19356	19824	20176	20531	20566	21007	21198	21275	21624	21785	22095	22232	22329	22586	22762	22913	23483	23560	23744	24033	24305
GNF	31686	33378	34247	34262	34483	34946	34293	34639	34753	34846	34464	34961	34921	34962	34835	35071	34935	34967	34679	34892	34961	35320	34795	35004	34813	34957	34920	35470	35257	35230
GNF	31273	33819	34251	34332	33891	34487	34544	34335	34729	34482	34540	34530	34365	34456	34299	34577	34460	34301	34627	34746	34454	34618	34410	34463	34405	34482	34818	34582	34664	34672
TX	57248	57147	56823	56518	56595	56567	56093	56011	56174	56177	55973	56073	55477	55403	55130	55176	55212	55382	54911	54945	54817	55313	55186	54619	54991	54922	54775	54888	54921	54838
TX	39550	39435	38942	39230	39067	39162	38905	38899	38674	38597	38551	38504	38405	38574	38373	38372	38328	38264	38383	38276	38224	38202	38141	37867	37844	38042	38495	38070	38282	38182
Sil	42995	42346	42500	41672	41381	40965	41036	40631	40559	40267	39459	39863	39597	39465	39518	39677	39277	39593	39240	38765	39130	39100	38776	38871	38957	39419	38895	39015	38951	38877
Sil	42767	42418	42171	42109	42356	42100	41466	41513	41479	41365	41075	41034	41357	41206	41164	40805	40726	40843	40548	40562	40288	40813	40108	40761	40459	40812	40589	40397	40522	40446
Tad	41870	41383	40886	39828	40081	40590	39926	39693	39415	39427	39112	39318	38669	38659	38859	38728	38839	38553	38523	38300	37975	38203	38230	38237	38528	37853	38238	38399	38540	38412
Tad	38254	39090	39493	39425	39543	39762	40420	39678	40533	40363	39892	39777	39959	39722	39717	39653	39243	39485	39205	39586	39706	39434	39399	39538	39312	39221	39523	39506	39460	39439
TX	25366	25308	25458	25438	25323	25142	25084	24823	24916	24703	24987	24760	24817	24796	24693	24741	24566	24563	24296	24541	24397	24405	24516	24516	24670	24284	24479	24499	24524	24338
TX	44860	44608	44450	44999	44560	44396	44372	44256	44312	44200	44005	43734	43764	43011	43462	43559	42994	43361	43593	43422	43345	43050	42993	43002	43249	43239	42812	43014	42650	43320
AA	20823	21030	21216	21600	22120	22437	22672	23417	23626	23941	24190	24829	25110	25167	25835	26335	26807	26928	27260	27702	28237	28225	28475	28615	29338	29456	29529	29974	29892	30243
AA	19707	19933	20359	20595	20986	21294	21669	22006	22334	22796	23092	23636	23831	23951	24579	25075	25156	25456	25625	26132	26553	26661	26649	27086	27506	27736	27797	28300	28318	28413
GNF	31711	33568	34600	35641	35621	35673	35882	35200	35527	35623	34867	35006	35020	35443	35552	35551	35846	35744	35427	35320	36157	35363	35591	35384	35858	35380	35639	35937	35784	35467
GNF	29271	31342	32261	33619	33559	33877	33937	34057	33980	34091	34433	34413	34257	34329	34509	34492	34500	34484	34644	34809	34800	34210	34835	34705	34807	35334	34781	35207	34713	34868
Buffer	5359	5407	5553	5531	5723	5759	5839	5880	6027	6110	6096	6126	6210	6287	6281	6363	6437	6465	6488	6557	6575	6614	6746	6743	6853	6787	6900	6869	6935	7007
Buffer	5755	5827	5921	6050	6115	6208	6296	6353	6424	6484	6546	6630	6692	6708	6827	6908	6978	7048	7047	7074	7177	7184	7279	7257	7351	7340	7272	7369	7342	7458
Sil	43040	43604	42586	43061	41699	41429	41299	40882	40803	40699	40806	40944	40793	39891	40125	40722	40055	39965	40085	40013	40078	39958	40064	39546	39973	40096	40096	40029	39870	40309
Sil	47421	46979	46382	46970	46637	46231	45646	45408	45026	45348	45106	45320	44734	44571	44721	44717	44603	43932	44352	43838	44315	43997	44447	43990	44332	44593	43816	44089	43902	43995
Tad	44688	45374	44615	44641	43173	42662	42300	41929	42274	41846	41716	41504	41395	41618	41362	41108	41417	41221	41215	41039	41323	41050	40796	40765	40790	40924	41154	40930	40225	40944
Tad	43414	43437	42838	42391	42673	42339	42039	42079	42050	41281	41679	41490	41081	41108	41080	41238	41067	40941	40977	41056	41151	40475	40691	40650	40698	40805	40823	41054	40742	41075
Buffer	7856	7985	8134	8248	8360	8321	8541	8663	8670	8799	8902	8780	9005	9066	9051	9164	9307	9261	9320	9333	9424	9412	9460	9527	9634	9618	9534	9628	9650	9786
Buffer	4514	4540	4701	4777	4860	4936	4999	5107	5182	5181	5280	5316	5353	5438	5476	5479	5605	5632	5694	5750	5775	5818	5894	5859	5965	5947	6018	6032	6107	6164
AA	23389	24100	24782	25523	26012	26451	27126	27627	27886	28601	28975	29574	30216	30557	30953	31247	31844	31930	32556	32499	33265	33402	33759	33776	34523	34726	34834	34835	35446	35312
AA	24555	24602	25350	26076	26630	27156	27937	28395	28660	29128	29796	30135	30792	30798	31406	31799	32027	32382	32796	32895	33273	33680	33679	34022	34098	34502	34718	34785	35228	35376
GNF	29287	31650	32733	33084	33769	34106	34147	34215	34278	34307	34456	34589	34340	34341	34406	34630	35062	34974	34588	34817	35086	35063	34859	34983	35155	34846	35088	35088	35276	34993
GNF	31183	32471	34607	33880	34441	34912	34827	35625	35462	35426	35373	35511	35499	35626	35750	35567	35745	36087	36123	36089	35828	36334	36072	36528	36521	36318	36634	36493	36453	36799
Sil	46760	46806	46214	45852	45792	45201	45361	44882	44699	44814	44759	44724	44822	44842	44038	44675	44381	44190	44104	44349	44242	44219	44239	44147	43751	44003	44151	44060	43989	43809
Sil	45409	47136	47271	47342	47285	46266	46385	46390	45923	46183	45939	45557	46091	45500	45712	45645	46047	45412	45513	45581	45585	45281	45565	45432	45235	45401	44983	45087	44753	44849
Tad	43080	43875	44013	44776	44135	43847	43681	43407	42805	43143	42758	43071	42774	42559	42596	42627	42699	42311	42341	42542	42300	42069	41726	41924	42011	42004	42056	42259	41993	41948
Tad	44171	45327	45204	45117	45962	44857	44430	44742	44222	44015	43853	43799	43798	44142	43734	43710	43644	43844	43631	43594	43376	43571	43376	43263	42536	43555	43450	43275	43380	43315
AA	32738	34574	35569	36097	36437	36677	37026	38163	37554	37916	37367	37951	37841	38060	38016	38161	38140	38215	38219	38241	38430	38634	38255	38422	38507	38643	38944	38914	38978	38836
AA	33943	36601	37172	37238	37700	37345	38146	38289	38886	38624	38703	38758	38490	39161	39160	39597	38918	38958	39070	38996	38917	39471	39251	39612	39536	39472	39219	39254	38872	38691
GNF	39829	42809	43289	43727	44020	43966	43582	43036	43111	43534	43146	44113	43818	43948	43704	43870	43624	43725	44067	43777	43466	44261	44291	43826	43824	44163	44642	44257	44696	44689
GNF	36726	38821	39586	39823	39772	40614	40148	40470	40766	40694	41385	41165	41702	41524	42048	41302	40937	41182	41365	40657	41151	41332	41093	41510	40606	41169	41406	41171	41252	40831
Sil	50890	50053	50462	50224	50079	49441	49759	49262	49323	48873	49288	48843	48437	48559	48664	48191	48552	48598	48484	48311	48094	48318	48405	47931	47977	48046	48342	47790	48355	47988
Sil	51870	52451	52849	52659	51741	51192	51201	51092	51444	50275	51086	50274	49865	50036	50091	50117	50312	49816	50139	49685	49737	49659	50136	49335	50096	49743	49782	49917	49794	49905
Tad	50750	50975	50425	50223	49823	49685	49032	48926	48963	48794	48711	48829	48527	48852	48005	48304	48213	48385	48253	47943	47851	48035	47833	47465	47880	47068	47632	47755	47730	47873
Tad	51406	52499	51552	51947	50900	50800	50471	50281	50496	49951	49193	49987	49525	49608	49276	49111	49307	48560	48921	48605	49140	49049	49132	48909	48753	48189	49146	48820	49183	48488
AA	39769	41907	42511	43151	43372	44084	44188	44386	44950	44897	44863	45002	45229	45026	45137	45164	45157	44949	45580	45463	45410	45670	45232	45605	45679	45853	45622	45883	45737	45428
AA	37509	39847	39825	40836	41520	41748	42261	42370	42705	42994	42765	43375	43559	43411	43739	43289	42648	43801	43208	43790	43529	43964	43510	43723	43904	43764	44122	43787	43701	43950
GNF	38972	42000	42086	43436	43521	43848	44010	43475	44784	45173	45205	45594	45501	45640	45733	44960	45233	45822	45497	45327	45703	45771	45786	45401	46105	46165	45980	46016	45792	46082
GNF	39673	42895	43286	44475	45082	45741	46081	45839	46282	46076	46705	46914	46480	46892	46346	46922	46758	46680	46433	46621	46871	47103	46987	47026	46954	47076	46897	46404	46709	47132
Sil	53855	53917	53030	53224	52648	52317	51822	51548	51178	50790	50658	50443	50231	50400	50555	50105	49812	50229	49661	49608	49765	49976	49283	49351	49751	49663	49292	49225	48862	49406
Sil	55212	56365	56224	56116	55512	55535	54724	54074	54460	53747	53635	53509	53582	53315	53181	53081	52707	52608	52984	53018	52915	52928	52882	53137	52866	52601	53170	53200	52448	52707
Tad	56168	56520	55624	55616	55335	54300	53701	53464	53294	53121	52815	52320	52418	52127	52184	52221	51709	51528	51295	51615	51713	51408	51191	51306	51301	51409	51311	51171	51334	50437
Tad	58643	58620	58245	57768	56843	55728	55703	55080	54899	54762	55236	54596	54969	54660	53852	53785	54196	54152	53687	53327	53736	53584	53419	53413	53902	53732	53257	53464	53321	53147
AA	44586	47116	47917	47823	47857	47795	48230	48484	48734	49452	49203	49174	49185	49078	49337	49617	49739	49699	49531	49755	49749	50110	50060	49697	49703	49806	50080	49638	50193	49847
AA	43888	46401	46629	46565	46931	47097	46868	48047	48033	48461	48013	48354	48270	48457	48782	48807	48594	48366	48533	48763	48797	48747	48341	48895	48917	48788	48444	48608	48672	48820
GNF	44904	47445	48634	48394	48534	49624	50030	50040	50454	50656	50517	50458	50836	51231	50656	51025	51136	51092	51485	51134	51536	51645	51639	51562	52316	51629	51967	52243	51795	52038
GNF	41216	44118	45307	45878	47261	47394	47363	48286	48429	49667	49924	49197	49355	49058	49443	49582	49618	49395	49727	49655	49700	49840	49577	49517	49527	49696	49444	49901	49772	49710
Sil	60257	59234	59492	58715	59092	58089	57148	56979	56728	56345	56202	56130	56220	55740	56179	55854	55991	56194	55402	55560	55238	55941	55632	55486	55511	55339	55253	55847	55079	55270
Sil	60381	60068	58276	58314	57681	57663	56851	57389	56573	56575	56458	56420	55631	55665	56357	55889	55918	55255	54861	55775	55437	55100	54861	55116	54989	54917	54721	55076	54724	54582
Tad	59505	58963	59044	58733	58026	57724	57062	57204	56594	56178	56502	55434	56053	55770	55867	55416	55603	55453	55479	55695	55444	54866	54675	54459	54704	54602	54544	54346	55004	55005
Tad	61757	61224	61780	60877	60164	59334	59276	58549	57897	58036	58029	57751	57765	57325	57004	57469	56701	56465	56467	56928	56661	56249	56285	56336	56404	55719	56001	55750	55966	55107
AA	47718	50648	51005	52330	52287	51670	51328	51911	52273	52141	52149	51909	52499	52050	52122	52243	52285	52627	52467	52828	52648	52420	52651	52826	52805	52152	52540	52648	52773	52415
AA	47268	49139	50859	50718	50638	50849	51264	51242	52101	52041	51930	51591	51589	51775	51505	51663	52027	52443	51770	52274	52472	51728	52731	52495	52369	52922	52327	52757	52167	52666
GNF	48467	51802	52324	52912	52311	52378	53137	52941	53381	52931	52806	52559	52934	53342	53302	53427	53417	53528	54066	53207	53847	53365	54135	53609	53857	53438	53759	54322	54034	53465
GNF	46582	49597	50327	51594	51848	52655	53386	53841	53433	53261	53126	53189	53540	53466	53919	54215	54307	54037	54143	53561	54623	54778	54730	54745	54835	54671	54498	54792	54797	55407

## Sheet: Sheet4
		Sil								Sil
		1	2	3	4	5	6			1	2	3	4	5	6	Average				1	2	3	4	5	6
	0	51361	53483	49069	47233	56179	54861		0	100	100	100	100	100	100	100	1		0	1	1	1	1	1	1
	0.01	46678	50547	48684	48069	49661	52984		0.01	90.8822	98.4151	94.7879	93.5905	96.6901	103.16	96.2543	0.956221		0.01	0.89461	0.981519	0.938903	0.922545	0.960318	1.03526
	0.025	51856	53644	52726	49986	48484	50139		0.025	100.964	104.445	102.658	97.3229	94.3985	97.6208	99.5681	0.994952		0.025	1.01114	1.05183	1.03115	0.967649	0.932844	0.973452
	0.05	47441	49350	45049	45000	44104	45513		0.05	92.3677	96.0846	87.7105	87.6151	85.8706	88.6139	89.7104	0.879739		0.05	0.911781	0.954341	0.855941	0.850336	0.830603	0.872953
	0.1	47350	48666	47918	46361	40085	44352		0.1	92.1906	94.7528	93.2965	90.265	78.0456	86.3535	89.1507	0.873196		0.1	0.909733	0.938812	0.92142	0.882358	0.73679	0.847731
	0.25	40497	41402	38067	37483	39240	40548		0.25	78.8478	80.6098	74.1165	72.9795	76.4004	78.9471	76.9835	0.73099		0.25	0.755508	0.773887	0.69659	0.673474	0.717065	0.765089
	0.5	38742	39984	43605	42171	38166	38349		0.5	75.4308	77.849	84.899	82.107	74.3093	74.6656	78.2101	0.745327		0.5	0.716012	0.741692	0.822984	0.783775	0.691996	0.717316
	1	37079	38450	41280	39862	37692	37617		1	72.1929	74.8622	80.3723	77.6114	73.3864	73.2404	75.2776	0.711052		1	0.678587	0.706863	0.76992	0.729448	0.680931	0.701414
	Buffer	6926	7619	7209	8147	9320	5694		Buffer	13.4849	14.2456	14.6916	17.2485	16.5898	10.379	14.4399	0		Buffer	0	0	0	0	0	0
		Tad								Tad
		1	2	3	4	5	6			1	2	3	4	5	6					1	2	3	4	5	6
	0	53354	53708	48522	47930	55867	57004		0	103.88	100.421	98.8852	101.476	99.4446	103.906	101.335	1		0	1	1	1	1	1	1																			=
	0.01	50710	49441	50052	48724	52184	53852		0.01	98.7325	96.2618	97.4514	94.8658	101.602	104.85	98.9606	0.972751		0.01	0.943052	0.951738	0.98303	0.921861	1.02589	1.01005
	0.025	51054	51709	49809	52688	48005	49276		0.025	99.4023	100.678	96.9783	102.584	93.4659	95.9405	98.1747	0.963733		0.025	0.950461	1.00298	0.977431	1.0131	0.928255	0.91519
	0.05	52290	51806	44683	44020	42596	43734		0.05	101.809	100.866	86.9979	85.7071	82.9345	85.1502	90.5775	0.876561		0.05	0.977083	1.00517	0.859314	0.813591	0.801879	0.800308
	0.1	50645	45992	45386	45661	41362	41080		0.1	98.6059	89.5465	88.3667	88.9021	80.5319	79.9829	87.656	0.84304		0.1	0.941652	0.873813	0.875513	0.851361	0.773048	0.745292
	0.25	46157	40548	37053	31516	38859	39717		0.25	89.8678	78.9471	72.1423	61.3617	75.6586	77.3291	75.8844	0.707971		0.25	0.844986	0.750814	0.683498	0.525791	0.714568	0.717038
	0.5	39810	37781	40243	39395	38649	38002		0.5	77.5102	73.5597	78.3532	76.7022	75.2497	73.99	75.8942	0.708083		0.5	0.708279	0.688297	0.757004	0.707139	0.709662	0.681487
	1	37994	36190	40466	39247	38492	37647		1	73.9744	70.462	78.7874	76.414	74.944	73.2988	74.6468	0.69377		1	0.669165	0.652351	0.762143	0.703732	0.705994	0.674128
	Buffer	6926	7619	7061	7975	9051	5476		Buffer	13.4849	14.2456	14.3899	16.8844	16.111	9.98159	14.1829	0		Buffer	0	0	0	0	0	0
		AA								AA
		1	2	3	4	5	6			1	2	3	4	5	6	Average				1	2	3	4	5	6
	0	53525	54955	50328	48347	52415	52666		0	104.213	102.752	102.566	102.359	93.3	95.999	100.198	1		0	1	1	1	1	1	1
	0.05	48992	51796	49697	45794	49847	48820		0.05	95.3876	100.847	96.7602	89.161	97.0522	95.0527	95.7101	0.947839		0.05	0.903725	0.978846	0.932502	0.845225	1.04642	0.988516
	0.1	54333	50753	49392	46658	45428	43950		0.1	105.786	98.8162	96.1664	90.8432	88.4484	85.5708	94.2719	0.931124		0.1	1.01716	0.956299	0.925598	0.864953	0.939976	0.873451
	1	45533	41173	38886	39171	38836	38691		1	88.6529	80.1639	75.7111	76.266	75.6138	75.3315	78.6232	0.749252		1	0.830261	0.749208	0.687779	0.693997	0.781186	0.749195
	10	32853	30832	38875	35498	35312	35376		10	63.9649	60.03	75.6897	69.1147	68.7526	68.8772	67.7382	0.622743		10	0.560955	0.525666	0.68753	0.610129	0.696298	0.67087
	20	27581	23671	24814	16027	30243	28413		20	53.7003	46.0875	48.3129	31.2046	58.8832	55.3202	48.9181	0.404013		20	0.448985	0.370866	0.369237	0.165534	0.574194	0.506353
	40	21299	17763	25927	22921	25199	24305		40	41.4692	34.5846	50.4799	44.6272	49.0625	47.3219	44.5909	0.353721		40	0.315564	0.243152	0.394432	0.322949	0.452692	0.409292
	80	16544	15557	18209	16938	20808	20929		80	32.2112	30.2895	35.453	32.9783	40.5132	40.7488	35.3657	0.246503		80	0.214574	0.195465	0.219723	0.186335	0.34692	0.329526
	Buffer	6441	6784	8123	8072	7007	7458		Buffer	12.5406	12.6844	16.5542	17.0897	12.4726	13.5944	14.156	0		Buffer	0	0	0	0	0	0
		GNF								GNF
		1	2	3	4	5	6			1	2	3	4	5	6					1	2	3	4	5	6
	0	54550	54831	46669	48533	53465	55407		0	106.209	102.52	95.1089	102.752	95.169	100.995	100.459	1		0	1	1	1	1	1	1
	0.05	55148	56863	46770	50102	52038	49710		0.05	107.373	110.712	91.0613	97.5487	101.318	96.7855	100.8	1.00395		0.05	1.01243	1.09119	0.948474	0.939255	1.07436	0.951834
	0.1	50258	53151	47301	48224	46082	47132		0.1	97.8525	103.485	92.0952	93.8923	89.7218	91.7661	94.8022	0.934452		0.1	0.910786	1.01074	0.961635	0.89657	0.93413	0.894405
	1	48304	46672	40066	41635	44689	40831		1	94.048	90.8705	78.0086	81.0635	87.0096	79.4981	85.083	0.821836		1	0.87017	0.87032	0.782313	0.746811	0.901333	0.754039
	10	37201	15002	40075	38695	34993	36799		10	72.4304	29.2089	78.0261	75.3393	68.1315	71.6477	65.7973	0.598371		10	0.639381	0.183941	0.782536	0.679988	0.67305	0.66422
	20	34870	33194	30325	30291	35467	34868		20	67.892	64.6288	59.0429	58.9767	69.0543	67.8881	64.5805	0.584271		20	0.590929	0.578213	0.540879	0.488976	0.68421	0.621203
	40	32892	32568	36237	36999	35230	34672		40	64.0408	63.41	70.5535	72.0371	68.5929	67.5065	67.6901	0.620303		40	0.549814	0.564646	0.68741	0.64144	0.67863	0.616837
	80	31265	30968	34842	34789	36284	36740		80	60.873	60.2948	67.8375	67.7343	70.645	71.5329	66.4862	0.606354		80	0.515995	0.52997	0.652835	0.59121	0.703446	0.662905
	Buffer	6441	6784	8123	8072	7007	7458		Buffer	12.5406	12.6844	16.5542	17.0897	12.4726	13.5944	14.156	0		Buffer	0	0	0	0	0	0
