# Supplementary material for: Inhibitors of the small membrane (M) protein viroporin prevent Zika virus infection
Source: eLife journal article supplement (doi:10.7554/elife.68404), 2024-08-23
Supplement: supp [file 7ABC.xlsx]

## Sheet: Sheet1
	ZIKV gradients + M Inhibitors
																													NB 10 ul, so x 100 for IU/mL
																										Total counts
Fraction	1	2	3	4	5	6	7	8	9	10	11	12	13	14	15	16	17	18	19	20	21	22	23	24
DMSO	1	7	13	23	15	24	51	37	20	23	45	72	4	2	33	18	18	41	88	172	603	490	100	38		1938						100	700	1300	2300	1500	2400	5100	3700	2000	2300	4500	7200	400	200	3300	1800	1800	4100
Rim	12	27	33	23	57	77	91	87	54	96	159	37	4	7	7	4	14	19	42	91	72	183	116	94		1406						1200	2700	3300	2300	5700	7700	9100	8700	5400	9600	15900	3700	400	700	700	400	1400	1900
AA	14	31	28	19	30	16	36	38	42	54	102	49	13	17	14	27	33	5	19	51	65	77	97	26		903						1400	3100	2800	1900	3000	1600	3600	3800	4200	5400	10200	4900	1300	1700	1400	2700	3300	500
GNF	22	76	80	43	44	39	18	4	15	57	121	71	32	20	18	16	10	23	29	39	29	60	73	41		980						2200	7600	8000	4300	4400	3900	1800	400	1500	5700	12100	7100	3200	2000	1800	1600	1000	2300
[truncated: 6 more columns]

## Sheet: Sheet2
Fraction no.	Mass of eppy	Mass of eppy & fraction	Mass of fraction	Density of fraction
1	0.97201	1.1846	0.21259	1.06295	1062.95
2	0.97314	1.18911	0.21597	1.07985	1079.85
3	0.97337	1.19138	0.21801	1.09005	1090.05
4	0.97696	1.1943	0.21734	1.0867	1086.7
5	0.97246	1.19194	0.21948	1.0974	1097.4
6	0.97688	1.19852	0.22164	1.1082	1108.2
7	0.97366	1.19482	0.22116	1.1058	1105.8
8	0.97763	1.1987	0.22107	1.10535	1105.35
9	0.97457	1.1905	0.21593	1.07965	1079.65
10	0.96953	1.19255	0.22302	1.1151	1115.1
11	0.97465	1.1872	0.21255	1.06275	1062.75
12	0.93123	1.1516	0.22037	1.10185	1101.85
13	0.97423	1.19791	0.22368	1.1184	1118.4
14	0.97168	1.19652	0.22484	1.1242	1124.2
15	0.93114	1.15621	0.22507	1.12535	1125.35
16	0.97357	1.19976	0.22619	1.13095	1130.95
17	0.9676	1.18787	0.22027	1.10135	1101.35
18	0.97469	1.19849	0.2238	1.119	1119
19	0.92754	1.15581	0.22827	1.14135	1141.35
20	0.97361	1.20014	0.22653	1.13265	1132.65
21	0.9747	1.20228	0.22758	1.1379	1137.9
22	0.97727	1.20634	0.22907	1.14535	1145.35
23	0.97454	1.19954	0.225	1.125	1125
24	0.9774	1.20984	0.23244	1.1622	1162.2
							1	1.0564
							2	1.07297
							3	1.08266
							4	1.08953
							5	1.09487
							6	1.09922
							7	1.10291
							8	1.1061
							9	1.10891
							10	1.11143
							11	1.11371
							12	1.11579
							13	1.1177
							14	1.11947
							15	1.12112
							16	1.12266
							17	1.12411
							18	1.12548
							19	1.12677
							20	1.128
							21	1.12916
							22	1.13028
							23	1.13134
							24	1.13236

## Sheet: Sheet3
											% of total per fraction
					R	D	G	A
				Fraction
				1	31.4159	20.0698	71.0031	79.754			10.2886	5.94028	11.0192	8.34957
				7	26.1012	21.2166	68.6356	70.1832			8.54803	6.2797	10.6518	7.34759
				13	42.6845	194.426	73.2307	332.1			13.979	57.5462	11.3649	34.768
				19	23.1832	25.1688	95.3651	135.706			7.59241	7.44948	14.8	14.2072
				20	60.9774	23.7606	111.274	116.971			19.9699	7.03268	17.269	12.2459
				21	42.0813	13.5433	91.533	84.5323			13.7815	4.00856	14.2053	8.84983
				22	35.5265	14.6231	71.1949	62.1266			11.6348	4.32815	11.049	6.50413
				23	43.3774	25.0521	62.1216	73.8138			14.2059	7.41493	9.64084	7.72769
				Total	305.347	337.86	644.358	955.186
		Infectivity		Fraction	20	21	22	23
				D	172	603	490	100			17200	60300	49000	10000
				R	91	72	183	116			9100	7200	18300	11600
				G	51	65	77	97			5100	6500	7700	9700
				A	39	29	60	73			3900	2900	6000	7300
					23.7606	13.5433	14.6231	25.0521
					60.9774	42.0813	35.5265	43.3774
					111.274	91.533	71.1949	62.1216
					116.971	84.5323	62.1266	73.8138
		Particle infectivity ratio
				Fraction	20	21	22	23					T-test
				D	723.887	4452.39	3350.86	399.169		3901.62	778.894
				R	149.236	171.097	515.109	267.42		391.265	175.142		0.0248992
				G	45.8327	71.0126	108.154	156.145		132.15	33.9352		0.0207263
				A	33.3415	34.3064	96.577	98.8974		97.7372	1.6408		0.020327
							yellow = peaks
														DMSO
														Rim
														AA
														GNF
				RNA	Infectivity
			Fraction	13	13	per mL		Spec Infectivity
			D	194.426	72	7200		37.0322
			R	42.6845	159	15900		372.501
			G	73.2307	102	10200		139.286
			A	332.1	121	12100		36.4349
