# Supplementary figures and images for: Inhibitors of the small membrane (M) protein viroporin prevent Zika virus infection
Source: eLife journal article supplement (doi:10.7554/elife.68404), 2024-08-23

Enw 1st

GAPDH 1st

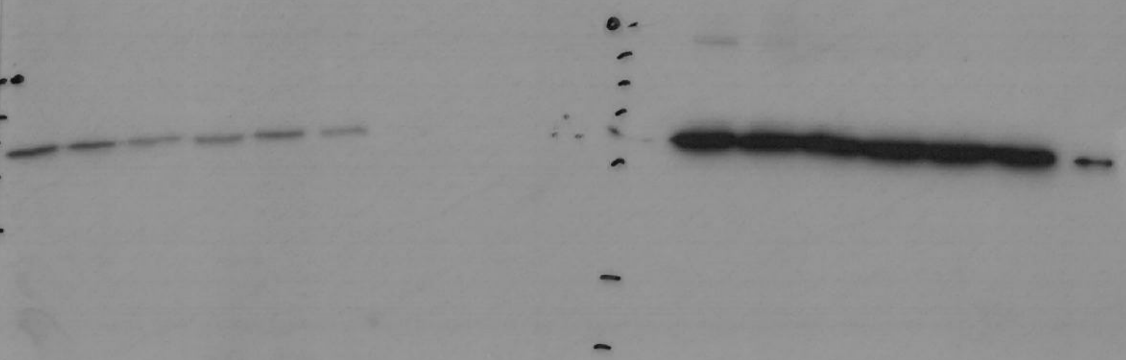

Enw 2nd

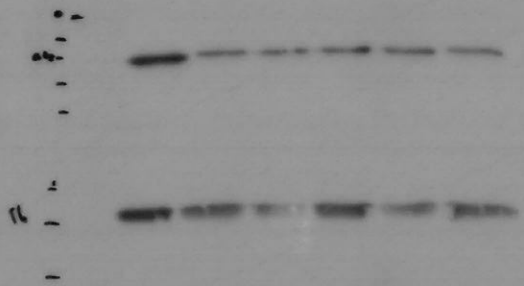

Enw 3rd

GAPDH. 3rd

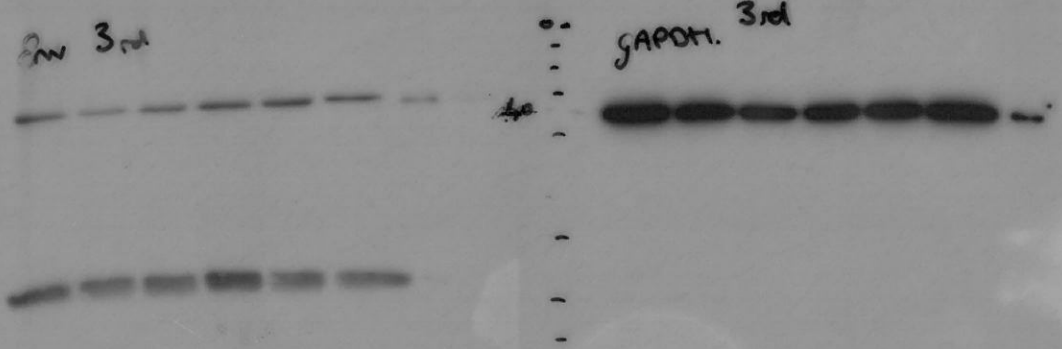

Supplement: fig3-data1 [file elife-68404-fig3-data1-v2.zip]

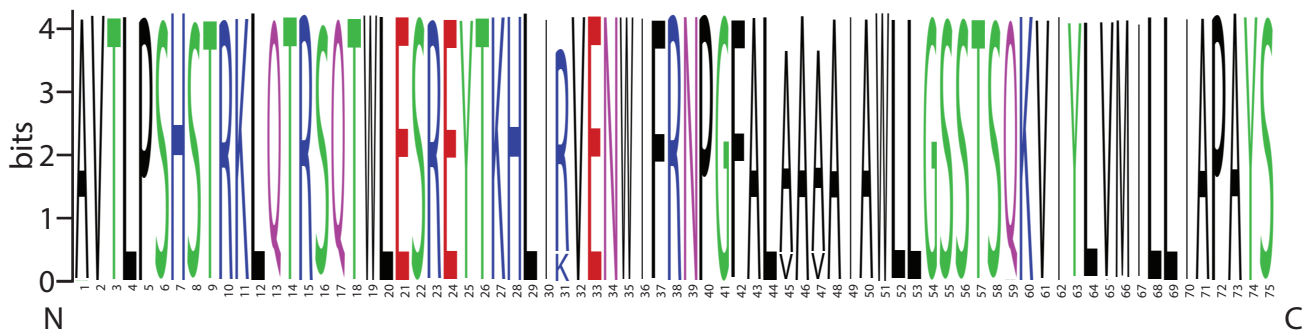

Supplement: fig4-data1 [file elife-68404-fig4-data1-v2.zip]
